# Supplementary material
Source: PubMed Central journal article supplement (PMC3416432)
Supplement: AEM.00765-12_zam999103461so1.pdf [file AEM.00765-12_zam999103461so1.pdf]

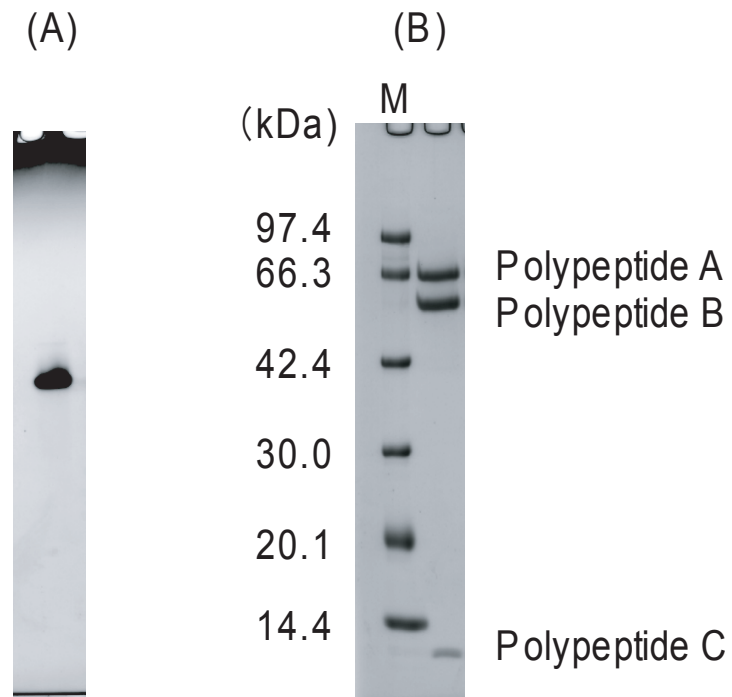

FIG. S1. Native PAGE and SDS-PAGE of purified AsGahA  
Purified AsGahA was analyzed by native PAGE (A) and SDS-PAGE (B).  
Lane M indicates molecular mass markers.
