# Supplementary material
Source: PubMed Central journal article supplement (PMC3416432)
Supplement: AEM.00765-12_zam999103461so2.pdf [file AEM.00765-12_zam999103461so2.pdf]

gtccgtgggagaaggagtgaatccttaacgtggagcagctgttctgctggatgggatagctagttatcaatttctgcaattgaaatgacaaca -721  
tctgagcttcaagacaccggggaagtccacctgaatgatcactccatccaggccacatatggttagaccccagcacaagctttaa -631  
gcctatgggcattatccgaagcaagcagctgatttggggatgaatgttcgctcagcctcttattttttatggatgatgttctctatgcgt -541  
ggacctgaaagatgccattctctctctcggcaggcaagttaatatttaatgaagttacggctacattcttaaaaaagaactcgacaaactc -451  
tattttgaatgagtagaagaaacacagcattcttcatcggaatcatgaaatccatagaagaaacaacaagttggacagacttaccatgggga -361  
aaagatccgaagaccggagaacgcggcttcgcttggaaatcaactatcgctatgtctaccgagagcacagcagagcagcagcagcagat -271  
aacaaggctgacaaggacccccgggaaacaccggagatctcctaataataggattcagcgatgatgcccagactaaatcatgaatggagcc -181  
ggccaagcagattagatctacttggcgtcgggctatcgcgaccacgataagagtgttattacacaatttaagggttgctctatctcgagc - 91  
atcgtgcttgtgactaatgccaaccctcactgtaataataaagaggaagat**C**ggcagcattcaaaatgagggtgacagacttaatccttc - 1

ATGTTTCTTAGTACACTCTCTCACTGGCGGGCGTTCGTTGCCGGCGCTGCCATCCCCAATGGCCAGACGCTTCTCTCAATGACATTCCT 90  
M F L S T L L S L A A V V A G A A A I P N G Q T L S L N D I P  
.....  
TACTATGTGAGCGGCATTCCTGTGTCAACTTTGCAAGGGTACAATGCCCTCTGCATATGCTGCTTTGACAAAGGGAATAGATTTGGTGCCA 180  
Y Y V S G I P V S T L Q G Y N A S A Y A A L T K G I D L V P

TAACTGTCTTCTGTAACCTCTACCACGAACTTGGAGTCGCTGCATCGGACTATGTTGAACGCGATGATGTCTTCCAGCCGGCTTTT 270  
L T V I P V T P T T N L E S L L S D Y V E R D D V F Q P A F

CTGCGTGCAGTCTATCTCACAGCTTCCACTGCTGATGACATTGACTCCCAACTGAGCAATTATGCGTCAATTCTCAAGTCTTCCGGCACC 360  
L R A V Y L T A S T A D D I D S Q L S N Y A S I L K S S G T

GACGTGCTGCTGGTTGATTGAGAAGTACACACCCTTCGTCAGATTCCACAATCAGACGCGAGTTGACCAAAGAGCTGCCAGTGGGCGCT 450  
D V L L V D S E V H T A S S D S T I T A Q L T K E L P S G P  
.....  
TATTTTGTCTCTTGTATACTGAGAGGTTTGTAGAGCGTACCGGTTGTACCTGACGACAACCTAGCTTTCATTCAAGCAGGAATCAGT 540  
Y F V S L Y T G E V F R A Y R L Y P D D N L A F I Q A G I S

GACGAGAAGGAGGTTGCTGCCCCCTACCAGCCGTGACAGAAAACGCGATGACCAAAGACGTTGCCGTGCCCTCACGCTCTATTATACA 630  
D E K G G V L P L P A V T E N A M T K D V A V P S R L Y Y T

CCGACCGCAGAAAAGCCATTAGCCGGTCTGAGGTAGGTGTCAAGGATATCTACCACGTTAAAGGCTCAAGACGAGTGGCGGCGAGTCGC 700  
P T A E K P L A G L R L G V K D I Y H V K G L K T S G G S R

TCCTATTATTATTATACGGAACCTCAGAATGCTACTGCCCATCTATTAGAGACTGTTGGACTTAGGCGCGGCTTCTTGTGCGTAAACT 810  
S Y Y Y L Y G T Q N V T A P S I Q R L L D L G A V F V G K T

GGGACCGTTCAGTTTGTAAACGGTGTGACCTACTGCCGACTGGGTGGATTTCCTACTGTCCATTCAACCcACGCGGAGAAGGATATCAG 900  
G T V Q F A N G D R P T A D W V D F H C P F N P R G E G Y Q

GCAcCTAGCGGTTCTCTCCGGCTCAGGTGTGGCTATTGCAGCCTACGACTGGTTGGACCTGCTGCTGGTGTAGTGACACTGGCGGTTCA 990  
A P S G S S S G S G V A I A A Y D W L D L A V G S D T G G S

ATCGGTTCCCCAGCTGCAGTTCAAGGATATATGGCAACAGGCCATCTACTGGCGCTATCTCTCTAGATCATGTCTTACCTCTCTCGCG 1080  
M R S P A A V Q G I Y G N R P S T G A I S L D H V L P L S P

GCTCTGGATACAGCGGGCGTCTTTGCCCGAAGTGCCTCACTATGGTCCCATACTGTGCAAGCTTGGTATCTCTCATCTCCAGCACAATTT 1170  
A L D T A G V F A R S A S L W S H T V Q A W Y P H L Q H N F

ACGTCCTTCCCTCGGCAGCTGCTCCTAGCCGGTGGTGGATGGGATGGTAAAGGCATCAGTCCCAGGCCCATCAGAGTCTTACCACATTC 1260  
T S F P R Q L L L A G G G W D G K G I S P E A H Q S L T T F

ACACGTGGGCTTGGAGCATTCCTCGGAACAAACCATACCAATGTCGACGTGTGCGAGCGATGGCTTGACACACTCTCCACCACACCA 1350  
T R G L E A F L G T N H T N V D V S Q R W L D T H S P T T P

AGCCTGGAAGAGATGCTCAACCTGACCTATGCCACACTTACTTCTGTGGATCAGTTCAACCACCTAGCCGTCCCTCTCTTTGCTGACTAT 1420  
S L E E M L N L T Y A T L T S V D Q F N H L A V P L F A D Y

AAAGCCGTCCACCGCGGTCGTCAGCCTTTCATTAAACCCCGcCCaTtAGCGGTTGGCAGTGGGgCcAGGCGAATGGCGGAAACAcTCG 1530  
K A V H R G R Q P F I N P G P L A R W Q W G Q A N G G N T S

TACGATGCAGCTCTGCGCAACATGACTAcTTTCCGAAACTGGTGGGAGAAGTCCGGGTATGGTCAGTCCGATAATGCCTCTTGTCTCCAG 1620  
Y D A A L R N M T T F R N W W E K S G Y G Q S D N A S C S R

TCGCTTTTCTGTCAGTGTATTTCGGTCCGACCACTGACTACCGTAACCAATATTATGAGGCGCCACTACACCCCACTGGGATTCTCG 1710  
S L F V S V Y S V G T T D Y R N Q Y Y E A P T T P P L G F S

ATCGGACGCATCGCGGTATTAGGTGGAGCACCTGAGGTTGTTGTTCTGTGGGAGAGTCCCCATAAATAGTACTATCTCTTTGCAGACC 1800  
I G R I A V L G G A P E V V V P V G E S P Y N S T I S L Q T

GAGTATTTCCCGCTCAGTGTTCGCTGCGATGGCGGAGGATGTGACCATGTTCTGGCTTCTTGGTCTGCGCTTGAGAAGAAGGGC 1890  
E Y L P V S V A L Q M A R G C D H V L A S L V A G L E K K G

GTCCTCCGACCTGTGAGTACCAGCTCTCGCTTACTCTAAatgaaaaatcacagatgaagaggcggtatcaagctagggtaaagtacaa 1980  
V L R P V S T G S R L Y S \*

agtagagtatgtcggttcaacaaatggagcagactagatgtacatatatcatagaaggataatgacaatttctgctatat**A**ctcaa 2070  
tatcaacgagagaaaaggaagttcatgctgactgactactgaagataccaagcatggagaggatctcgttaattagaaacatatgttcc 2160  
acgagaataatattcaccagcaacagttgtatgaactgcgatgactctgctgagccatgaataaaggatgatggctacggca 2250  
tactggtctgacccttggcatccgttcccggtgggtcaggggttttccatccatcggtttactgttgaagtcaccgcatctcg 2340  
tcccggtgctgctccttctcagtttctctactgctcaggcaatcggtcaattggataaacttcacaaatttggttgaagcttcccccg 2430  
ccgagcaaaagtccaatgcccgcagctatcctgcccactaccaccaaggtcccccttgaccggtgaggttcttgaagataaagcattggga 2520  
tctccccgatagctcattgcctgtggagcctaactcaatacacatgacaacccccaatgcgattaccgagctatgacaacgctgt 2610  
cgataggccgagagctgtgacgaataactcatgcccctacacattctgttgccttaatacacagctcgggcaaggatcgggatgttccgat 2700

FIG. S2. Nucleotide and deduced amino acid sequences of the peptidoglutaminase-asparaginase from *Aspergillus sojae*. Residue 1 is the initiation methionine, and the asterisk indicates the stop codon. The transcription initiation and polyadenylation sites determined by RACE are marked in bold. Amino acid residues determined by sequencing of the purified AsGahA are underlined. N-terminal amino acids of polypeptide A or C, and polypeptide B are indicated by the solid and hollow triangles, respectively. The signal peptide sequence predicted by Signal-P (<http://www.cbs.dtu.dk/services/SignalP/>) is indicated by a dotted line.
