# Supplementary material
Source: PubMed Central journal article supplement (PMC3416432)
Supplement: AEM.00765-12_zam999103461so4.pdf [file AEM.00765-12_zam999103461so4.pdf]

TABLE S1. Purification of AsGahA from the *AsgahA*-overexpressing transformant

|                 | Total activity<br>(U) | Total protein<br>(mg) | Specific activity<br>(U/mg) | Purification<br>(fold) | Yield<br>(%) |
|-----------------|-----------------------|-----------------------|-----------------------------|------------------------|--------------|
| Crude Extract   | 505.41                | 1069.93               | 0.47                        | 1                      | 100          |
| Phenyl-5PW HPLC | 417.61                | 55.32                 | 7.55                        | 16                     | 83           |
| DEAE-5PW HPLC   | 253.78                | 18.46                 | 13.75                       | 29                     | 50           |
| G3000SW HPLC    | 192.48                | 12.29                 | 15.67                       | 33                     | 38           |
