# Supplementary material
Source: PubMed Central journal article supplement (PMC3416432)
Supplement: AEM.00765-12_zam999103461so5.pdf [file AEM.00765-12_zam999103461so5.pdf]

TABLE S2. Deamidation activity of purified CaGahA<sup>a</sup>

| Substrate         | Specific activity<br>( $\mu\text{mol}\cdot\text{min}^{-1}\cdot\text{mg}^{-1}$ ) | Relative activity<br>(%) |
|-------------------|---------------------------------------------------------------------------------|--------------------------|
| L-Gln             | 412.8 $\pm$ 52.6                                                                | 100                      |
| L-Gly-Gln         | 567.3 $\pm$ 23.7                                                                | 137                      |
| L-Ala-Gln         | 397.8 $\pm$ 86.3                                                                | 96                       |
| L-Leu-Gly-Gln     | 407.8 $\pm$ 47.3                                                                | 99                       |
| L-Pro-Leu-Gly-Gln | 372.7 $\pm$ 31.7                                                                | 90                       |
| L-Asn             | 31.1 $\pm$ 1.3                                                                  | 7.5                      |
| L-Gly-Asn         | 11.2 $\pm$ 1.9                                                                  | 2.7                      |
| L-Leu-Ala-Asn     | 1.0 $\pm$ 0.1                                                                   | 0.2                      |
| L-Leu-Gly-Asn     | 6.7 $\pm$ 0.2                                                                   | 1.6                      |
| L-Pro-Leu-Gly-Asn | 5.2 $\pm$ 1.0                                                                   | 1.4                      |

<sup>a</sup>CaGahA was purified as previously described (Ito *et al.*, Biosci. Biotechnol. Biochem. 75:1317–1324, 2011). The deamidation activity was determined by measuring the ammonia liberated from various substrates. Assays were carried out in triplicate, and the results represent the mean  $\pm$  SD values.
